# Supplementary material for: Polygenic burden has broader impact on health, cognition, and socioeconomic outcomes than most rare and high-risk copy number variants
Source: PubMed Central journal article supplement (PMC8589645; doi:10.1038/s41380-021-01026-z), 2021-02-01
Supplement: 41380_2021_1026_MOESM2_ESM.pdf [file 41380_2021_1026_MOESM2_ESM.pdf]

| <b>CNV</b>             | <b>Educational attainment</b> | <b>Household Income</b> | <b>Medical consequences</b> | <b>Count (FINRISK)</b> | <b>Frequency (FINRISK)</b> | <b>Count (NFBC1966)</b> | <b>Frequency (NFBC1966)</b> |
|------------------------|-------------------------------|-------------------------|-----------------------------|------------------------|----------------------------|-------------------------|-----------------------------|
| TAR dup                | x                             | x                       | x                           | 5                      | 0.02 %                     | 0                       | 0.00 %                      |
| 1q21.1 del             |                               | x                       | x                           | 8                      | 0.03 %                     | 2                       | 0.04 %                      |
| 1q21.1 dup             | x                             | x                       | x                           | 4                      | 0.02 %                     | 2                       | 0.04 %                      |
| NRXN1 del              |                               | x                       | x                           | 2                      | 0.01 %                     | 2                       | 0.04 %                      |
| 2q13 del               |                               | x                       |                             | 2                      | 0.01 %                     | 0                       | 0.00 %                      |
| 3q29 del               | x                             | x                       | x                           | 0                      | 0.00 %                     | 0                       | 0.00 %                      |
| 3q29 dup               |                               |                         | x                           | 0                      | 0.00 %                     | 0                       | 0.00 %                      |
| WBS dup                | x                             | x                       | x                           | 0                      | 0.00 %                     | 0                       | 0.00 %                      |
| 10q11.21q11.23 del     | x                             | x                       |                             | 1                      | 0.00 %                     | 0                       | 0.00 %                      |
| 15q11.2 del            | x                             | x                       |                             | 66                     | 0.29 %                     | 13                      | 0.27 %                      |
| 15q11.2 dup            | x                             |                         |                             | 82                     | 0.36 %                     | 18                      | 0.37 %                      |
| 15q11q13 dup (BP3-BP4) |                               | x                       | x                           | 0                      | 0.00 %                     | 0                       | 0.00 %                      |
| 15q11 dup (PW/AS)      | x                             | x                       | x                           | 1                      | 0.00 %                     | 0                       | 0.00 %                      |
| 15q13.3 del            |                               |                         | x                           | 5                      | 0.02 %                     | 1                       | 0.02 %                      |
| 15q13.3 dup            | x                             | x                       |                             | 1                      | 0.00 %                     | 4                       | 0.08 %                      |
| 16p13.11 del           | x                             | x                       |                             | 7                      | 0.03 %                     | 1                       | 0.02 %                      |
| 16p13.11 dup           | x                             | x                       | x                           | 9                      | 0.04 %                     | 7                       | 0.14 %                      |
| 16p12.1 del            | x                             | x                       | x                           | 1                      | 0.00 %                     | 6                       | 0.12 %                      |
| 16p11.2 distal del     | x                             | x                       | x                           | 0                      | 0.00 %                     | 1                       | 0.02 %                      |
| 16p11.2 distal dup     | x                             | x                       |                             | 0                      | 0.00 %                     | 1                       | 0.02 %                      |
| 16p11.2 del            | x                             | x                       | x                           | 6                      | 0.03 %                     | 3                       | 0.06 %                      |
| 16p11.2 dup            | x                             | x                       | x                           | 5                      | 0.02 %                     | 3                       | 0.06 %                      |
| 17p12 del (HNPP)       |                               |                         | x                           | 5                      | 0.02 %                     | 4                       | 0.08 %                      |
| 17p12 dup (CMT1A)      |                               |                         | x                           | 1                      | 0.00 %                     | 2                       | 0.04 %                      |
| 17q12 del              |                               |                         | x                           | 1                      | 0.00 %                     | 0                       | 0.00 %                      |
| 17q12 dup              | x                             |                         | x                           | 2                      | 0.01 %                     | 2                       | 0.04 %                      |
| 22q11.2 dup            | x                             | x                       | x                           | 8                      | 0.03 %                     | 5                       | 0.10 %                      |
| 22q11.2 del            | x                             | x                       | x                           | 0                      | 0.00 %                     | 1                       | 0.02 %                      |
