# Supplementary material for: Polygenic burden has broader impact on health, cognition, and socioeconomic outcomes than most rare and high-risk copy number variants
Source: PubMed Central journal article supplement (PMC8589645; doi:10.1038/s41380-021-01026-z), 2021-02-01
Supplement: 41380_2021_1026_MOESM4_ESM.pdf [file 41380_2021_1026_MOESM4_ESM.pdf]

DECIPHER CNVs in FINRISK and NFBC

| Name                                                                                   | Chr | Start (hg19) | End (hg19) | Del/Dup | Size (kb) | n(FINRISK)                        | f(FINRISK) | n(NFBC) | f(NFBC) | Literature estimate*                   | Source                                   | DOI                              |
|----------------------------------------------------------------------------------------|-----|--------------|------------|---------|-----------|-----------------------------------|------------|---------|---------|----------------------------------------|------------------------------------------|----------------------------------|
| 1p36 microdeletion syndrome                                                            | 1   | 10001        | 12840259   | DEL     | 12,830    | 0                                 | 0.0%       | 0       | 0.0%    | 0.020%                                 | Heilstedt et al 2003                     | 10.1034/j.1399-0004.2003.00126.x |
| 1q21.1 susceptibility locus for Thrombocytopenia-Absent Radius (TAR) syndrome          | 1   | 145386506    | 145748067  | DEL     | 362       | 0                                 | 0.0%       | 1       | 0.020%  | 0.018%                                 | Kendall et al 2019                       | 10.1192/bjp.2018.301             |
| 1q21.1 recurrent microdeletion (susceptibility locus for neurodevelopmental disorders) | 1   | 146533376    | 147883376  | DEL/DUP | 1,350     | 12                                | 0.052%     | 4       | 0.082%  | 0.069%                                 | Kendall et al 2019                       | 10.1192/bjp.2018.301             |
| 2p21 Microdeletion Syndrome                                                            | 2   | 44410451     | 44589584   | DEL     | 179       | 0                                 | 0.0%       | 0       | 0.0%    | Not reported outside the Middle East   | Parvari et al 2001                       | 10.1086/323624                   |
| 2p15-16.1 microdeletion syndrome                                                       | 2   | 59285696     | 61819815   | DEL     | 2,534     | 0                                 | 0.0%       | 0       | 0.0%    | 33 cases                               | Bagheri et al 2016                       | 10.1172/jci.insight.85461        |
| 2q33.1 deletion syndrome                                                               | 2   | 196925121    | 205206939  | DEL     | 8,282     | 0                                 | 0.0%       | 0       | 0.0%    | 13 cases                               | van Buggenhout et al 2005                | 10.1016/j.ejmg.2005.05.005       |
| 2q37 monosomy                                                                          | 2   | 239969863    | 240322643  | DEL     | 353       | 0                                 | 0.0%       | 0       | 0.0%    | 150 cases                              | ORPHANET                                 | N/A                              |
| 3q29 microdeletion syndrome                                                            | 3   | 195726835    | 197344663  | DEL     | 1,618     | 0                                 | 0.0%       | 0       | 0.0%    | 0.0033%                                | Kendall et al 2017                       | 10.1016/j.biopsych.2016.08.014   |
| Wolf-Hirschhorn Syndrome                                                               | 4   | 1569197      | 2110236    | DEL     | 541       | 0                                 | 0.0%       | 0       | 0.0%    | 0.0010%                                | Shannon, Maltby, Rigby nad Quarrell 2001 | 10.1136/jmg.38.10.674            |
| Cri du Chat Syndrome (5p deletion)                                                     | 5   | 10001        | 12533304   | DEL     | 12,523    | 0                                 | 0.0%       | 0       | 0.0%    | 0.0022%                                | Niebuhr 1978                             | 10.1007/BF00394291               |
| Familial Adenomatous Polyposis                                                         | 5   | 112043201    | 112181936  | DEL     | 139       | 0                                 | 0.0%       | 0       | 0.0%    | 0.00027%                               | ORPHANET/DECIPHER (Firth et al 2009)**   | 10.1016/j.ajhg.2009.03.010       |
| Adult-onset autosomal dominant leukodystrophy (ADLD)                                   | 5   | 126112314    | 126172712  | DEL     | 60        | SMALLER THAN DETECTION RESOLUTION |            |         |         | 20 families in different ethnic groups | ORPHANET                                 | N/A                              |
| Sotos syndrome                                                                         | 5   | 175724636    | 177052116  | DEL     | 1,327     | 0                                 | 0.0%       | 0       | 0.0%    | 0.009%                                 | ORPHANET                                 | N/A                              |
| Williams-Beuren Syndrome (WBS)                                                         | 7   | 72744455     | 74142672   | DEL/DUP | 1,398     | 0                                 | 0.0%       | 0       | 0.0%    | 0.013%                                 | Stromme et al 2002                       | 10.1177/088307380201700406       |
| Split hand/foot malformation 1 (SHFM1)                                                 | 7   | 96318078     | 96339203   | DEL     | 21        | SMALLER THAN DETECTION RESOLUTION |            |         |         | 0.0090%                                | ORPHANET                                 | N/A                              |
| 8p23.1 deletion syndrome                                                               | 8   | 8100055      | 11764629   | DEL/DUP | 3,665     | 0                                 | 0.0%       | 0       | 0.0%    | 50 cases                               | ORPHANET                                 | N/A                              |
| 8q21.11 Microdeletion Syndrome                                                         | 8   | 77226464     | 77766239   | DEL     | 540       | 0                                 | 0.0%       | 0       | 0.0%    | 0.0090%                                | ORPHANET                                 | N/A                              |
| 9q subtelomeric deletion syndrome                                                      | 9   | 140513443    | 140730578  | DEL     | 217       | 0                                 | 0.0%       | 0       | 0.0%    | 114 cases                              | ORPHANET                                 | N/A                              |
| WAGR 11p13 deletion syndrome                                                           | 11  | 31806339     | 32457087   | DEL     | 651       | 0                                 | 0.0%       | 0       | 0.0%    | 0.00020%                               | DECIPHER (Firth et al 2009)              | 10.1016/j.ajhg.2009.03.010       |
| Potocki-Shaffer syndrome                                                               | 11  | 43994800     | 46052450   | DEL     | 2,058     | 0                                 | 0.0%       | 0       | 0.0%    | 23 cases                               | ORPHANET                                 | N/A                              |
| 12p13.33 Microdeletion Syndrome                                                        | 12  | 1080000      | 1346471    | DEL     | 266       | 2                                 | 0.0087%    | 1       | 0.020%  | 0.0001%                                | ORPHANET                                 | N/A                              |
| 12q14 microdeletion syndrome                                                           | 12  | 65071919     | 68645525   | DEL     | 3,574     | 0                                 | 0.0%       | 0       | 0.0%    | 0.0001%                                | ORPHANET                                 | N/A                              |
| Prader-Willi/Angelman syndrome (Type 1)                                                | 15  | 22749354     | 28438266   | DEL/DUP | 5,689     | 0                                 | 0.0%       | 0       | 0.0%    | 0.0059%                                | Kendall et al 2017                       | 10.1016/j.biopsych.2016.08.014   |
| Prader-Willi/Angelman syndrome (Type 2)                                                | 15  | 23619912     | 28438266   | DEL/DUP | 4,818     | 1                                 | 0.0043%    | 0       | 0.0%    | 0.0059%                                | Kendall et al 2017                       | 10.1016/j.biopsych.2016.08.014   |
| 15q13.3 microdeletion syndrome                                                         | 15  | 30910306     | 32445407   | DEL     | 1,535     | 4                                 | 0.017%     | 1       | 0.020%  | 0.0073%                                | Kendall et al 2017                       | 10.1016/j.biopsych.2016.08.014   |
| 15q24 recurrent microdeletion syndrome                                                 | 15  | 74412643     | 75972911   | DEL     | 1,560     | 0                                 | 0.0%       | 1       | 0.020%  | 0.00066%                               | Kendall et al 2017                       | 10.1016/j.biopsych.2016.08.014   |
| 15q26 overgrowth syndrome                                                              | 15  | 99357970     | 102521392  | DEL     | 3,163     | 0                                 | 0.0%       | 0       | 0.0%    | 14 cases                               | Tatton-Brown et al 2009                  | 10.1002/ajmg.a.32534             |
| ATR-16 syndrome                                                                        | 16  | 60001        | 834372     | DEL     | 774       | 0                                 | 0.0%       | 0       | 0.0%    | 0.0001%                                | ORPHANET                                 | N/A                              |
| Rubinstein-Taybi Syndrome                                                              | 16  | 3775055      | 3930121    | DEL     | 155       | 0                                 | 0.0%       | 0       | 0.0%    | 0.0010%                                | ORPHANET                                 | N/A                              |
| 16p13.11 recurrent microdeletion (neurocognitive disorder susceptibility locus)        | 16  | 14986684     | 16486684   | DEL/DUP | 1,500     | 9                                 | 0.039%     | 8       | 0.16%   | 0.034%                                 | Kendall et al 2017                       | 10.1016/j.biopsych.2016.08.014   |
| 16p11.2-p12.2 microduplication syndrome                                                | 16  | 21475060     | 29284077   | DUP     | 7,809     | 0                                 | 0.0%       | 0       | 0.0%    | 12 cases                               | Barber et al 2013                        | 10.1038/ejhg.2012.144            |
| 16p11.2-p12.2 microdeletion syndrome                                                   | 16  | 21512062     | 30199854   | DEL     | 8,688     | 0                                 | 0.0%       | 0       | 0.0%    | 4 cases                                | Ballif et al 2007                        | 10.1038/ng2107                   |
| Recurrent 16p12.1 microdeletion (neurodevelopmental susceptibility locus)              | 16  | 21946524     | 22467284   | DEL     | 521       | 17                                | 0.074%     | 6       | 0.12%   | 0.054%                                 | Girirajan et al 2010                     | 10.1038/ng.534                   |
| 16p11.2 microduplication syndrome                                                      | 16  | 29606852     | 30199855   | DUP     | 593       | 4                                 | 0.017%     | 3       | 0.061%  | 0.030%                                 | Kendall et al 2017                       | 10.1016/j.biopsych.2016.08.014   |
| Miller-Dieker syndrome (MDS)                                                           | 17  | 1            | 2588909    | DEL     | 2,589     | 0                                 | 0.0%       | 0       | 0.0%    | 0.0010%                                | ORPHANET                                 | N/A                              |
| Charcot-Marie-Tooth syndrome type 1A (CMT1A)                                           | 17  | 14097915     | 15470903   | DUP     | 1,373     | 1                                 | 0.0043%    | 2       | 0.041%  | 0.030%                                 | Kendall et al 2019                       | 10.1192/bjp.2018.301             |
| Hereditary Liability to Pressure Palsies (HNPP)                                        | 17  | 14097915     | 15470903   | DEL     | 1,373     | 5                                 | 0.022%     | 4       | 0.082%  | 0.056%                                 | Kendall et al 2019                       | 10.1192/bjp.2018.301             |
| Smith-Magenis Syndrome                                                                 | 17  | 16773072     | 20222149   | DEL     | 3,449     | 0                                 | 0.0%       | 0       | 0.0%    | 0.0040%                                | Juyal et al 1996                         | N/A                              |
| Potocki-Lupski syndrome (17p11.2 duplication syndrome)                                 | 17  | 16773072     | 20222149   | DUP     | 3,449     | 0                                 | 0.0%       | 0       | 0.0%    | 0.00066%                               | Kendall et al 2017                       | 10.1016/j.biopsych.2016.08.014   |
| NF1-microdeletion syndrome                                                             | 17  | 29107097     | 30263321   | DEL     | 1,156     | 0                                 | 0.0%       | 0       | 0.0%    | 0.0026%                                | Kendall et al 2017                       | 10.1016/j.biopsych.2016.08.014   |
| RCAD (renal cysts and diabetes)                                                        | 17  | 34815072     | 36215917   | DEL     | 1,401     | 1                                 | 0.0043%    | 0       | 0.0%    | 0.00066%                               | Kendall et al 2017                       | 10.1016/j.biopsych.2016.08.014   |
| 17q21.31 recurrent microdeletion syndrome (Koolen de Vries syndrome)                   | 17  | 43705166     | 44294406   | DEL     | 589       | 0                                 | 0.0%       | 0       | 0.0%    | 0.0053%                                | Kendall et al 2017                       | 10.1016/j.biopsych.2016.08.014   |
| Early-onset Alzheimer disease with cerebral amyloid angiopathy                         | 21  | 27252860     | 27543446   | DUP     | 291       | 1                                 | 0.0043%    | 0       | 0.0%    | 0.009%                                 | ORPHANET                                 | N/A                              |
| Cat-Eye Syndrome (Type I)                                                              | 22  | 1            | 16971860   | DUP     | 16,972    | 0                                 | 0.0%       | 0       | 0.0%    | 0.0020%                                | ORPHANET                                 | N/A                              |
| 22q11 deletion syndrome (Velocardiofacial / DiGeorge syndrome)                         | 22  | 19009792     | 21452445   | DEL     | 2,443     | 0                                 | 0.0%       | 1       | 0.020%  | 0.0033%                                | Kendall et al 2017                       | 10.1016/j.biopsych.2016.08.014   |
| 22q11 duplication syndrome                                                             | 22  | 19009792     | 21452445   | DUP     | 2,443     | 7                                 | 0.030%     | 5       | 0.10%   | 0.066%                                 | Kendall et al 2019                       | 10.1192/bjp.2018.301             |
| 22q11.2 distal deletion syndrome                                                       | 22  | 21917117     | 23722445   | DEL     | 1,805     | 0                                 | 0.0%       | 0       | 0.0%    | 0.0020%                                | Kendall et al 2017                       | 10.1016/j.biopsych.2016.08.014   |
| 22q13 deletion syndrome (Phelan-Mcdermid syndrome)                                     | 22  | 51045516     | 51187844   | DEL     | 142       | 0                                 | 0.0%       | 0       | 0.0%    | Unknown                                | ORPHANET                                 | N/A                              |

\*Note: the frequency estimates are derived from very different samples. E.g. Kendall et al uses the UK Biobank, whereas most others are case-control studies

\*\*While the estimated frequency of FAP in Europe is an estimated 1/11300-1/37600, the majority (70%) of these carry a known (non-CNV mutation). CNV frequency for this syndrome is rarely solely reported, and this estimate is therefore non-representative
