# Supplementary material for: Polygenic burden has broader impact on health, cognition, and socioeconomic outcomes than most rare and high-risk copy number variants
Source: PubMed Central journal article supplement (PMC8589645; doi:10.1038/s41380-021-01026-z), 2021-02-01
Supplement: 41380_2021_1026_MOESM7_ESM.pdf [file 41380_2021_1026_MOESM7_ESM.pdf]

## Heatmap of correlation matrix between SNPDs in FINRISK

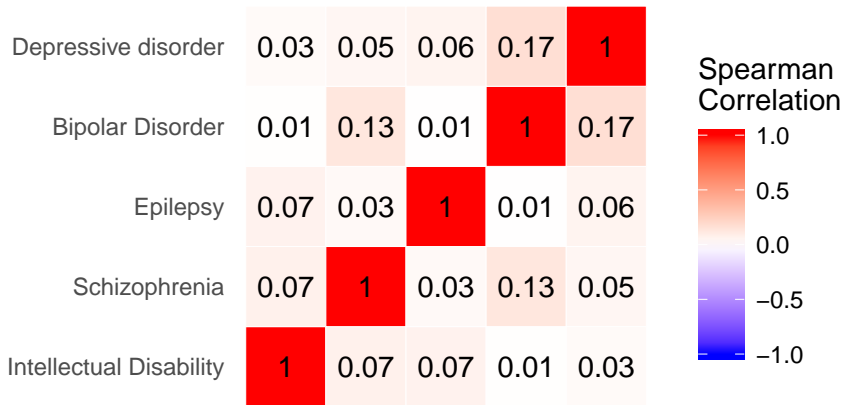

Intellectual Disability  
Schizophrenia  
Epilepsy  
Bipolar Disorder  
Depressive disorder
