# Supplementary material for: Polygenic burden has broader impact on health, cognition, and socioeconomic outcomes than most rare and high-risk copy number variants
Source: PubMed Central journal article supplement (PMC8589645; doi:10.1038/s41380-021-01026-z), 2021-02-01
Supplement: 41380_2021_1026_MOESM8_ESM.pdf [file 41380_2021_1026_MOESM8_ESM.pdf]

# Meta-analysis of CNV and PRS association to Severe Neurological and Psychiatric Disorders in Finland

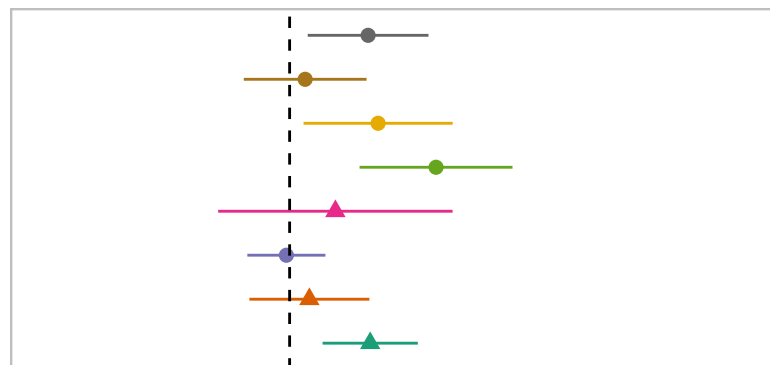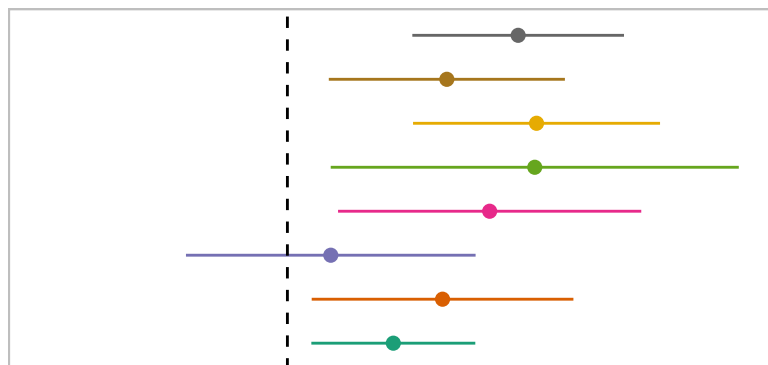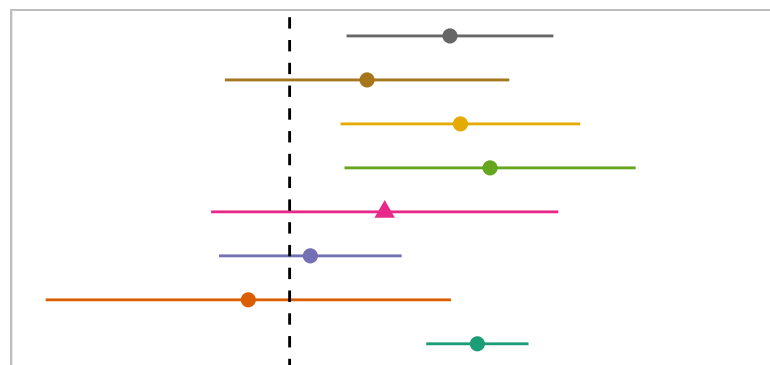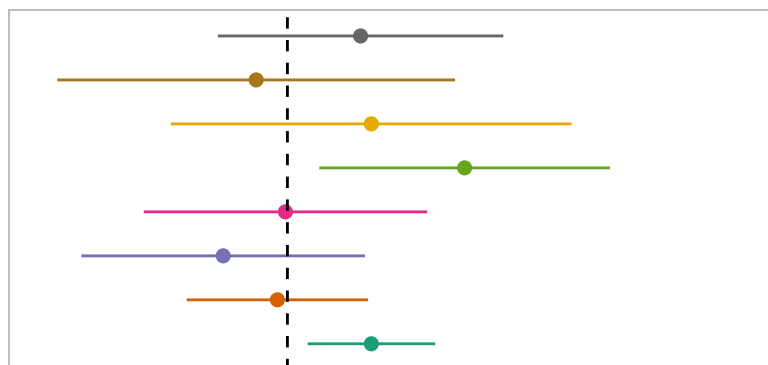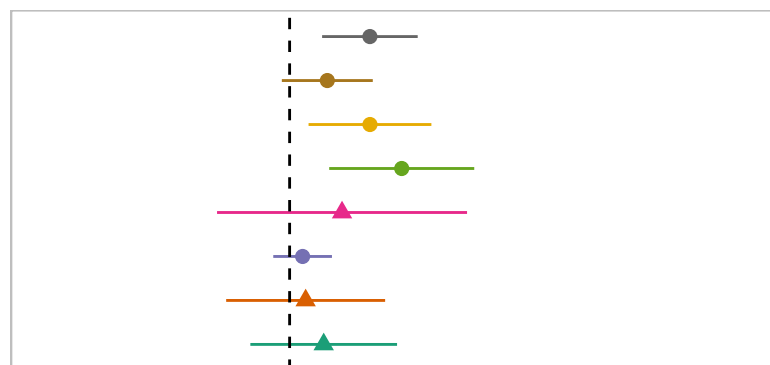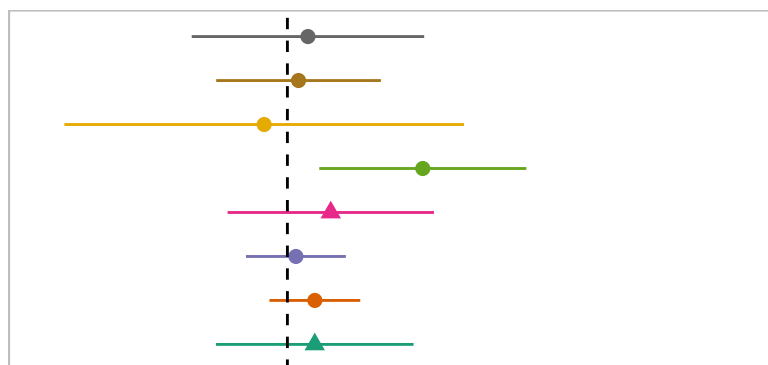

0.1 1.0 10.0 100.0 0.1 1.0 10.0 100.0  
Odds Ratio (95% Confidence Interval)

- >1 Mb Deletion (n = 167)
- >1 Mb Duplication (n = 256)
- Syndromic/Susceptibility CNV (n = 101)
- ID Gene deleted (n = 60)
- ▲ High pLI gene deleted (n = 342)
- Low PRS for educational attainment (n = 744)
- Low PRS for intelligence (n = 744)
- High PRS for Schizophrenia (n = 744)
