# Supplementary material for: Polygenic burden has broader impact on health, cognition, and socioeconomic outcomes than most rare and high-risk copy number variants
Source: PubMed Central journal article supplement (PMC8589645; doi:10.1038/s41380-021-01026-z), 2021-02-01
Supplement: 41380_2021_1026_MOESM9_ESM.pdf [file 41380_2021_1026_MOESM9_ESM.pdf]

# CNV and PRS association to severe neurological and psychiatric disorders in FINRISK (n = 23,053)

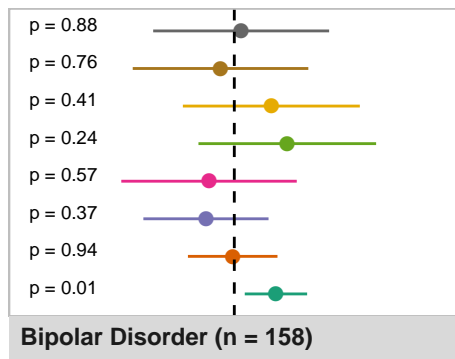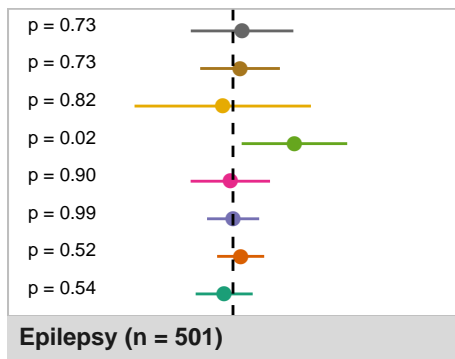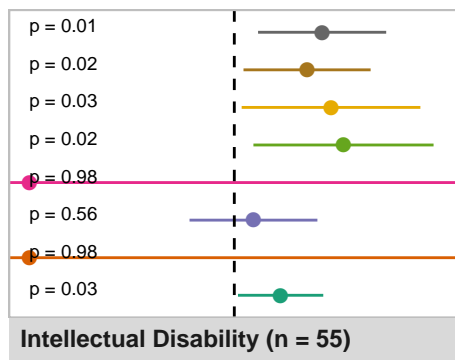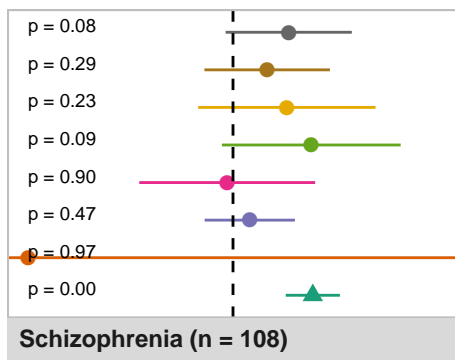

Odds Ratio (95% Confidence Interval)

- >1 Mb Deletion (n = 129)
- >1 Mb Duplication (n = 194)
- Syndromic or Susceptibility CNV (n = 53)
- ID gene deleted (n = 42)
- High pLI gene deleted (n = 264)
- Low PRS for Educational Attainment (n = 560)
- Low PRS for Intelligence (n = 560)
- ▲ High PRS for Schizophrenia (n = 560)
