# Supplementary material for: Polygenic burden has broader impact on health, cognition, and socioeconomic outcomes than most rare and high-risk copy number variants
Source: PubMed Central journal article supplement (PMC8589645; doi:10.1038/s41380-021-01026-z), 2021-02-01
Supplement: 41380_2021_1026_MOESM10_ESM.pdf [file 41380_2021_1026_MOESM10_ESM.pdf]

# CNV association to severe neurological and psychiatric disorders in NFBC (n = 4,895)

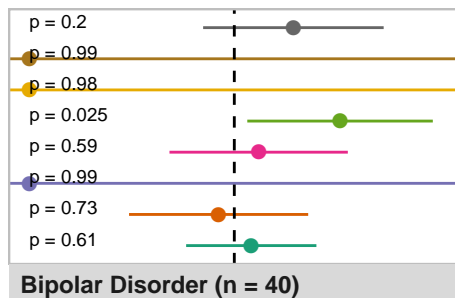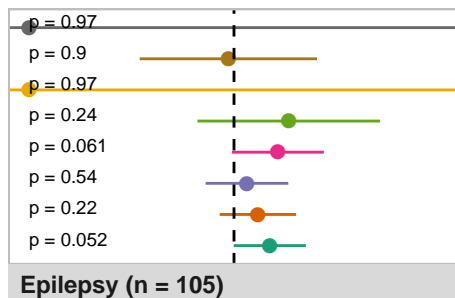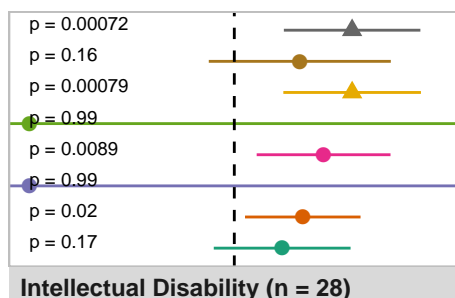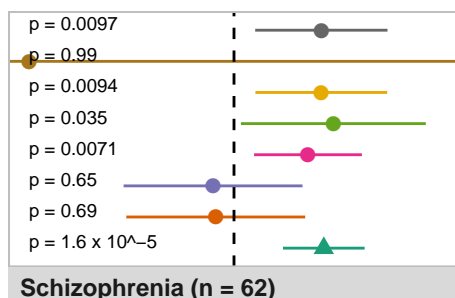

Odds Ratio (95% Confidence Interval)

- >1 Mb Deletion (n = 38)
- >1 Mb Duplication (n = 54)
- Syndromic or Susceptibility CNV (n = 37)
- ID Gene Deleted (n = 17)
- High pLI Gene Deleted (n = 78)
- PRS low for Educational Attainment (n = 171)
- PRS low for Intelligence (n = 171)
- PRS high for Schizophrenia (n = 171)
