# Supplementary material for: Polygenic burden has broader impact on health, cognition, and socioeconomic outcomes than most rare and high-risk copy number variants
Source: PubMed Central journal article supplement (PMC8589645; doi:10.1038/s41380-021-01026-z), 2021-02-01

Heatmap of correlation matrix between socioeconomic endpoints in FINRISK

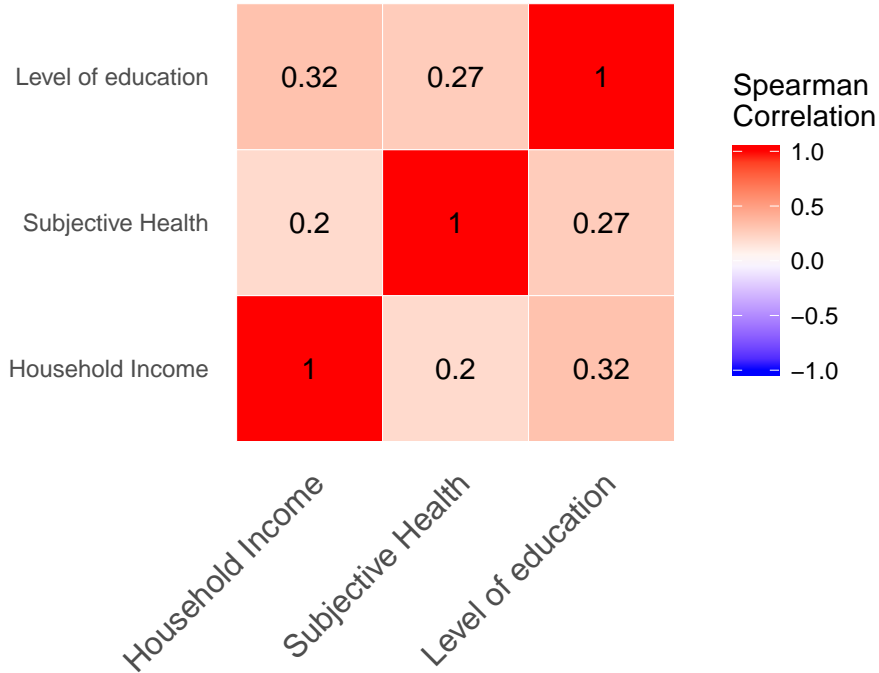

Supplement: 41380_2021_1026_MOESM11_ESM.pdf [file 41380_2021_1026_MOESM11_ESM.pdf]
